# Supplementary material for: An AIE-Active NIR Fluorescent Probe with Good Water Solubility for the Detection of Aβ1–42 Aggregates in Alzheimer’s Disease
Source: MDPI journal article supplement (doi:10.3390/molecules28135110), 2023-06-29
Supplement: s1 [file s1]

# 1 Experimental Procedures

**Table S1.** AIE-type fluorescent probes for the detection of A $\beta$  amyloid.

| Probe name            | Type            | Maximum absorption / emission wavelength (nm) | Water-solubility    | Emission enhancement (Folds) <sup>1</sup> | Amyloid                           | K <sub>d</sub> (nM) <sup>2</sup> | Mapping of A $\beta$ plaque <sup>3</sup> | Reference  |
|-----------------------|-----------------|-----------------------------------------------|---------------------|-------------------------------------------|-----------------------------------|----------------------------------|------------------------------------------|------------|
| Cur-N-BF <sub>2</sub> | <i>Light-up</i> | 470 / 572                                     | PBS buffer solution | -                                         | A $\beta$ <sub>1-42</sub> fibrils | -                                | -                                        | [1]        |
| QM-FN-SO <sub>3</sub> | <i>Off-on</i>   | 500 / 720                                     | PBS buffer solution | 50                                        | A $\beta$ <sub>42</sub> fibrils   | 170                              | in situ brain sections                   | [2]        |
| FB                    | <i>Turn-on</i>  | 565 / 605                                     | PBS buffer solution | 20                                        | A $\beta$ <sub>1-42</sub> fibrils | 47.91                            | brain sections                           | [3]        |
| TM-1                  | <i>Turn-on</i>  | 500 / 680                                     | 1% DMSO in          | 106                                       | A $\beta$                         | 35                               | brain                                    | [4]        |
| TM-2                  |                 | 430 / 650                                     | PBS buffer solution | 96                                        | aggregates                        | 92                               | sections                                 |            |
| <b>TMNL</b>           | <i>Turn-on</i>  | 360 / 645                                     | PBS buffer solution | 47                                        | A $\beta$ <sub>1-42</sub> fibrils | 410.4                            | in situ brain sections                   | This probe |

<sup>1</sup> "-" meant not mentioned.

<sup>2</sup> "-" meant not measured.

<sup>3</sup> "-" meant not mentioned.

**Table S2.** The selectivity comparison of AIE-type fluorescent probes for the detection of A $\beta$  amyloid.

| Probe name            | Graph                                                                                                                                                                                                                                                                                                          | Selectivity                       | Reference |
|-----------------------|----------------------------------------------------------------------------------------------------------------------------------------------------------------------------------------------------------------------------------------------------------------------------------------------------------------|-----------------------------------|-----------|
| Cur-N-BF <sub>2</sub> | <p>PL intensity (au)</p> <p>A<math>\beta</math> fibrils, HSA, Transferrin, Insulin, Lysozyme, Pepsin, Trypsin</p>                                                                                                                                                                                              | A $\beta$ <sub>1-42</sub> fibrils | [1]       |
| QM-FN-SO <sub>3</sub> | <p>High selectivity</p> <p>I<sub>660</sub> nm</p> <p>1 peanut agglutinin, 2 pepsin, 3 lysozyme, 4 tyrosinase, 5 <math>\alpha</math>-KA, 6 D-(+)-mannose, 7 D-galactose, 8 Leu, 9 Glu, 10 Phe, 11 Pro, 12 Thr, 13 Tro, 14 Tyr</p>                                                                               | A $\beta$ <sub>42</sub> fibrils   | [2]       |
| FB                    | <p>(a) Relative FL (%)</p> <p>Probe, A<math>\beta</math> aggregates, A<math>\beta</math> monomer, A<math>\beta</math> oligomer, BSA, HSA</p> <p>(b) Fluorescence intensity (a.u.)</p> <p>Blank, A<math>\beta</math> aggregates, Ala, Arg, Asp, Glu, Cys, Ile, Lys, Met, GSH</p>                                | A $\beta$ <sub>1-42</sub> fibrils | [3]       |
| TM-1<br>TM-2          | <p>Normalized FL intensity</p> <p>A</p> <p>1 Control, 2 Glycine, 3 Alanine, 4 Leucine, 5 Valine, 6 Proline, 7 prion, 8 A<math>\beta</math><sub>42</sub> aggregates</p> <p>B</p> <p>1 Control, 2 Glycine, 3 Alanine, 4 Leucine, 5 Valine, 6 Proline, 7 prion, 8 A<math>\beta</math><sub>42</sub> aggregates</p> | A $\beta$ aggregates              | [4]       |

**Table S3.** The molecular structures of the corresponding probes in Table S1-S2.

| Probe name            | Structure |
|-----------------------|-----------|
| Cur-N-BF <sub>2</sub> |           |
| QM-FN-SO <sub>3</sub> |           |
| FB                    |           |
| TM-1                  |           |
| TM-2                  |           |

## 2 $^1\text{H}$ NMR, $^{13}\text{C}$ NMR and HRMS Spectrum of New Compounds

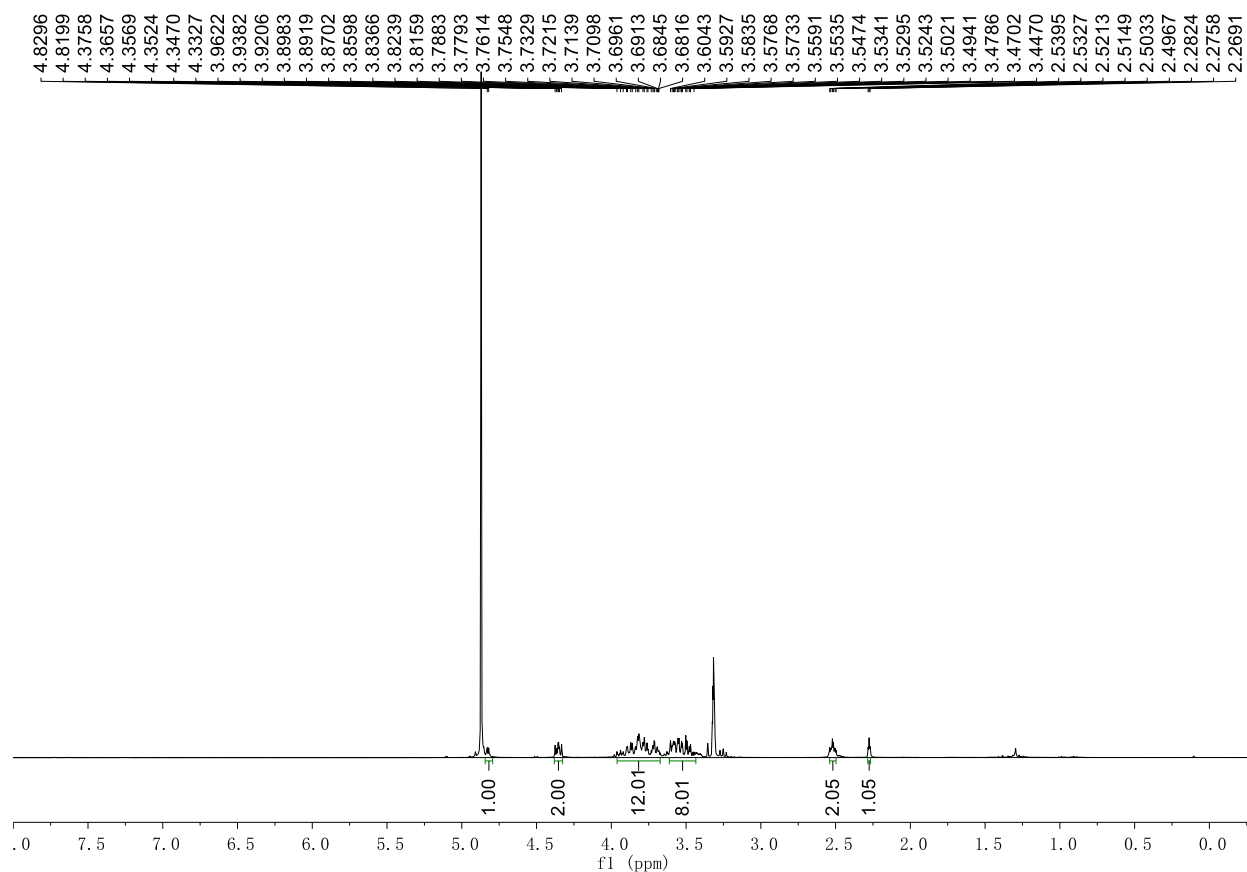

Figure S1.  $^1\text{H}$  NMR spectra of compound 4.

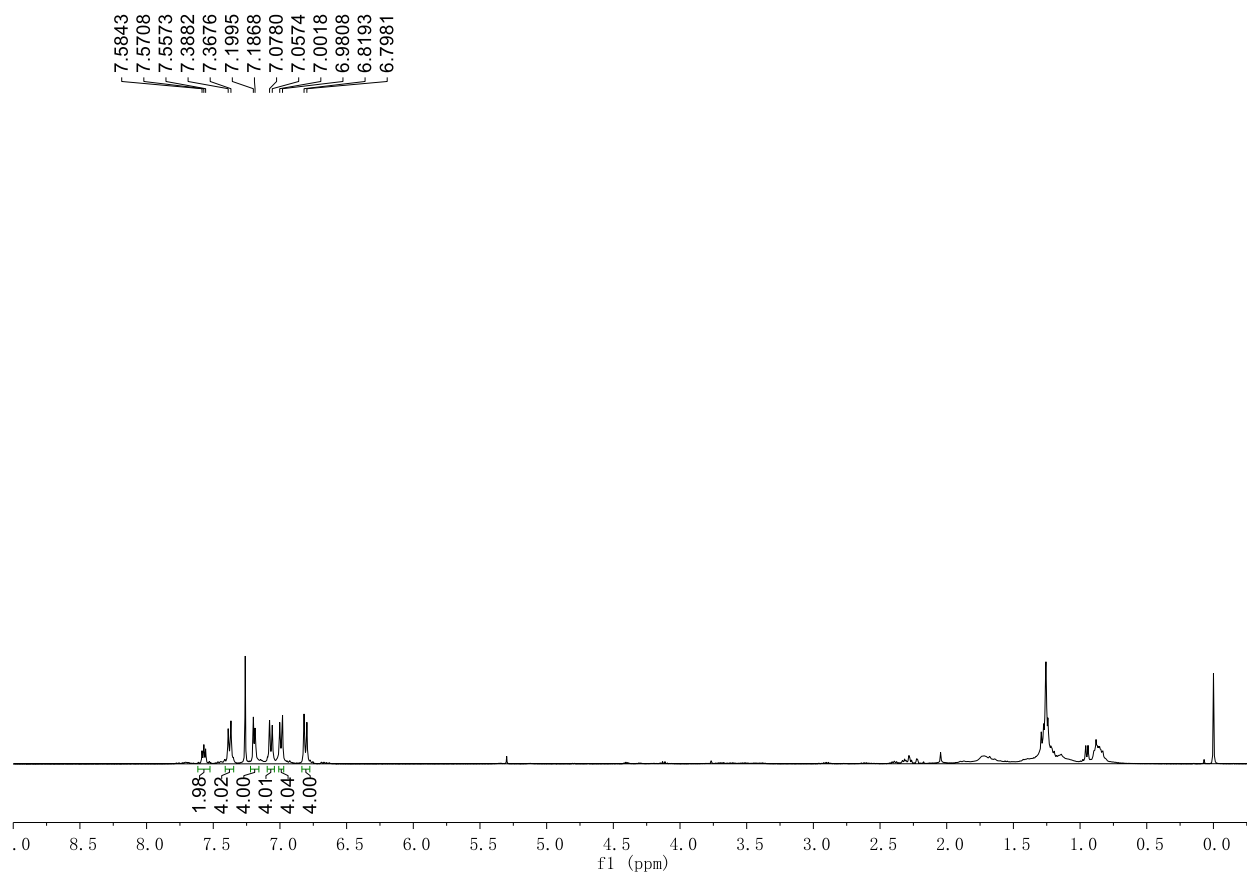

Figure S2.  $^1\text{H}$  NMR spectra of compound 13.

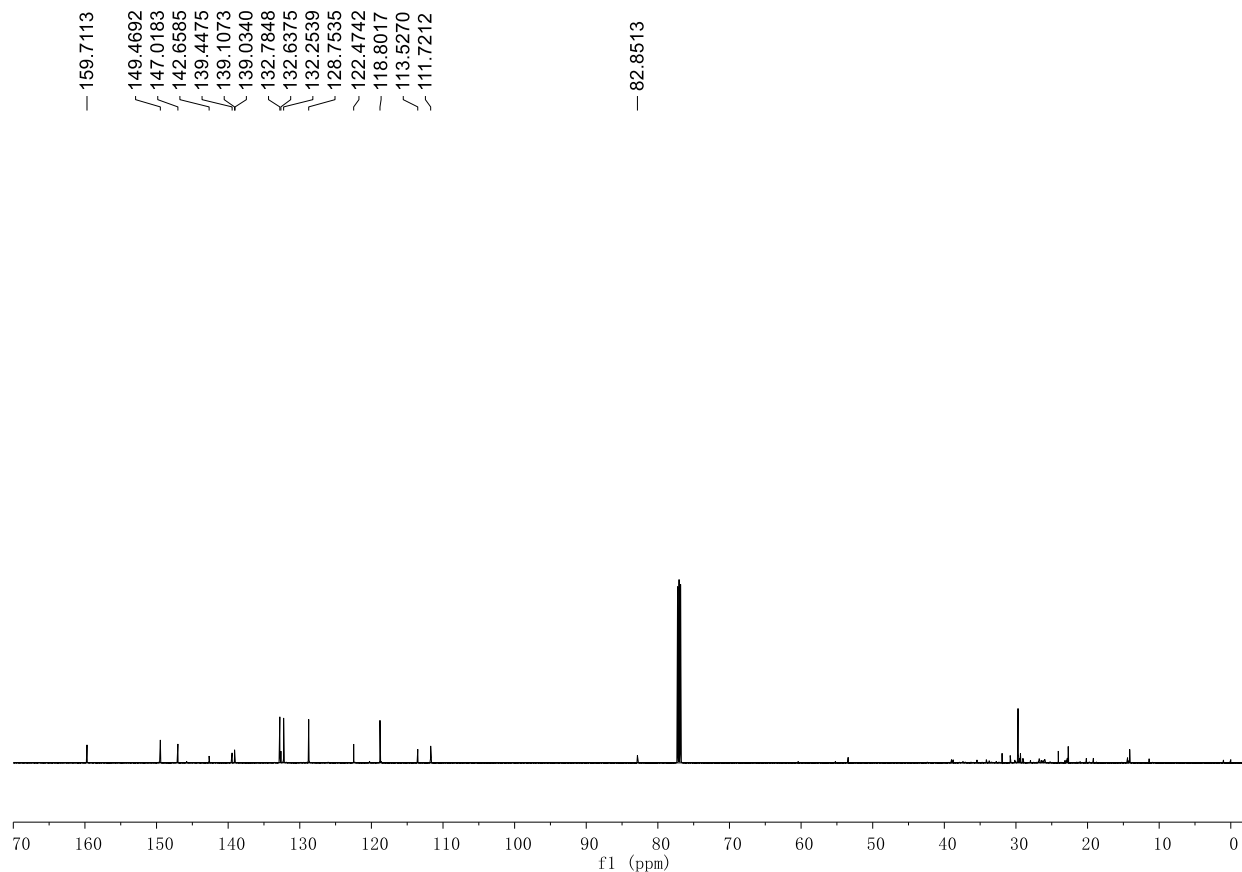

Figure S3.  $^{13}\text{C}$  NMR spectra of compound 13.

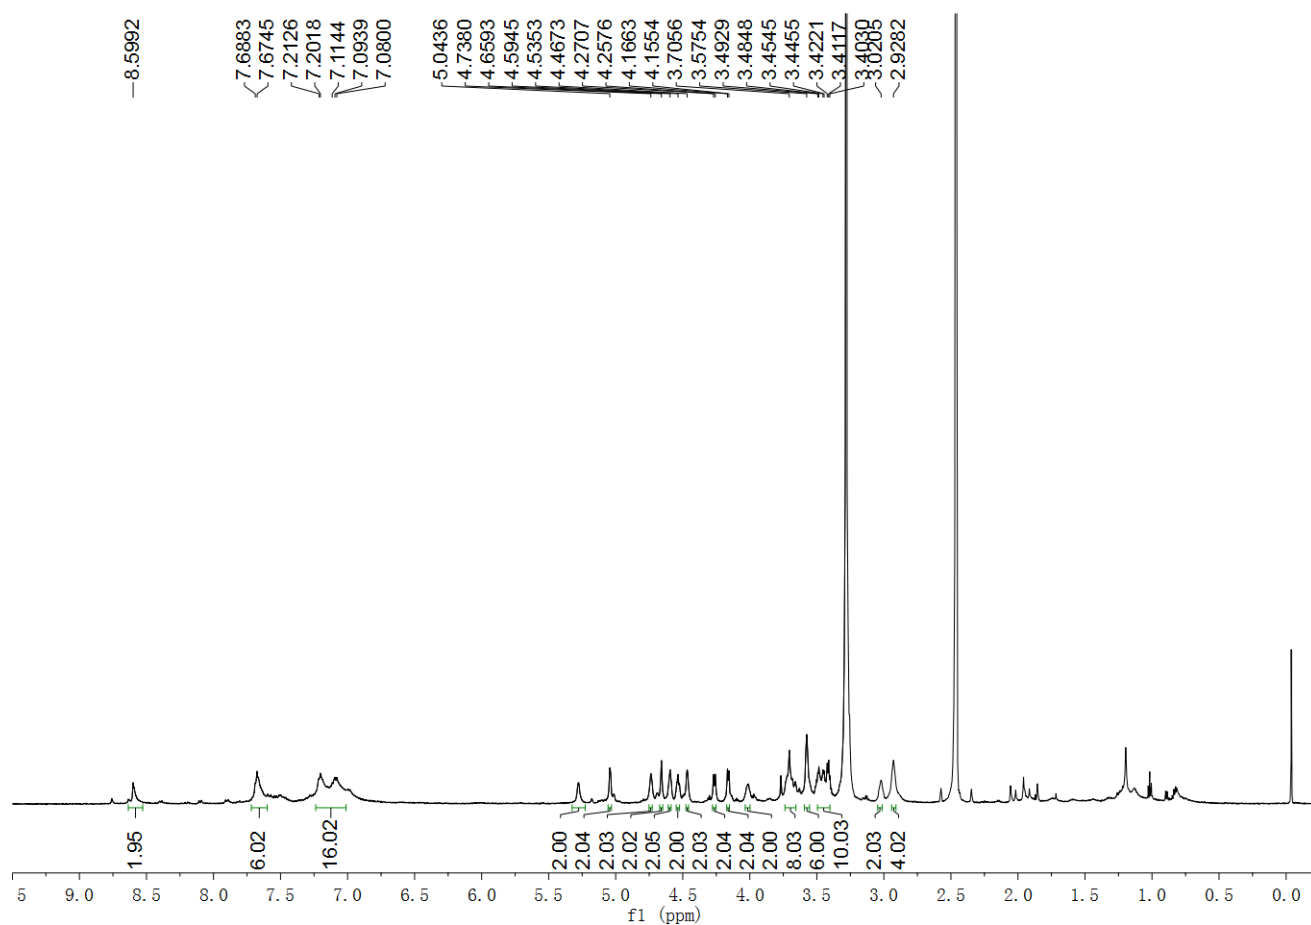

Figure S4.  $^1\text{H}$  NMR spectra of TMNL.

Acq. File: 20201010 (recalibrated1).wiff

Sample Name: NM-C-2CN-1009  
Sample Number: N/A

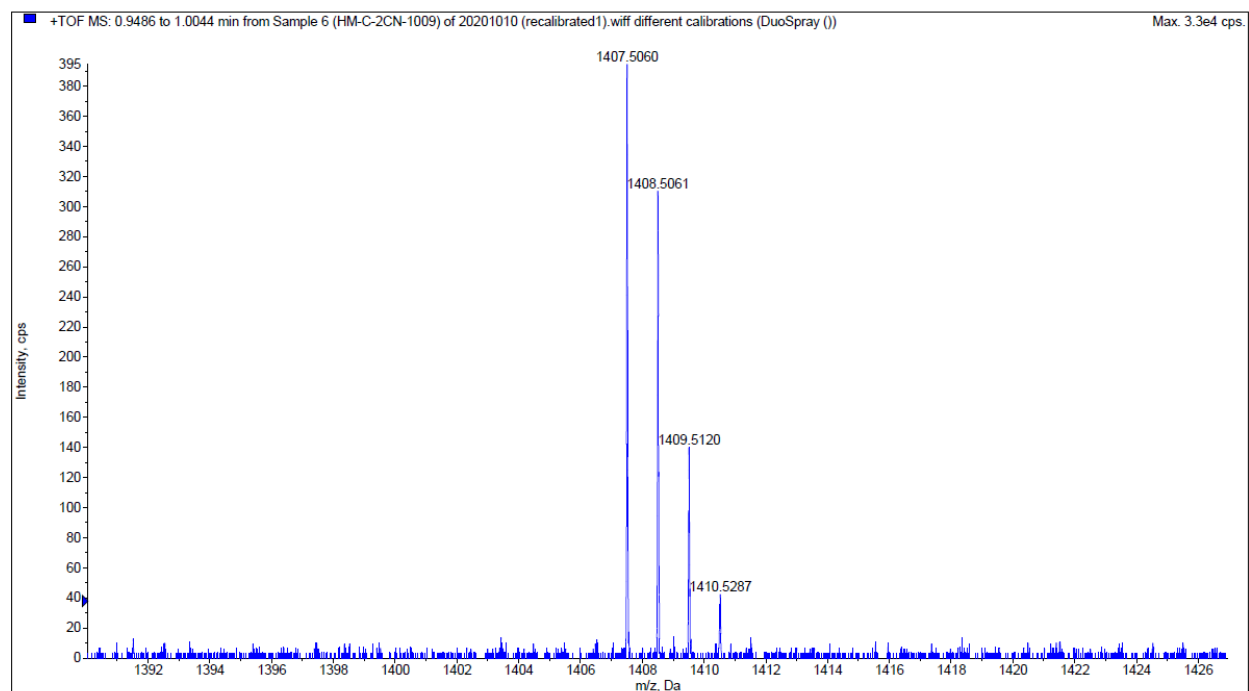

Figure S5. HRMS spectra of TMNL.

### 3 Reference

- [1] Yang Y.; Li S.; Zhang Q.; Kuang Y.; Qin A.; Gao M.; Li F.; Tang B.Z. An AIE-active theranostic probe for light-up detection of A $\beta$  aggregates and protection of neuronal cells. *J. Mater. Chem. B* **2019**, 7, 2434-2441.
- [2] Fu W.; Yan C.; Guo Z.; Zhang J.; Zhang H.; Tian H.; Zhu W.H. Rational Design of Near-Infrared Aggregation-Induced-Emission-Active Probes: In Situ Mapping of Amyloid- $\beta$  Plaques with Ultrasensitivity and High-Fidelity. *J. Am. Chem. Soc.* **2019**, 141, 3171-3177.
- [3] Wang Y.; Qiu Y.; Sun A.; Xiong Y.; Tan H.; Shi Y.; Yu P.; Roy G.; Zhang L.; Yan J. Dual-functional AIE fluorescent probes for imaging  $\beta$ -amyloid plaques and lipid droplets. *Anal. Chim. Acta* **2020**, 1133, 109-118.
- [4] Xu M.; Li R.; Li X.; Lv G.; Li S.; Sun A.; Zhou Y.; Yi T. NIR fluorescent probes with good water-solubility for detection of amyloid beta aggregates in Alzheimer's disease. *J. Mater. Chem. B* **2019**, 7, 5535-5540.
